# Supplementary material for: Coherency image analysis to quantify collagen architecture: implications in scar assessment
Source: Royal Society of Chemistry journal article supplement (doi:10.1039/c7ra12693j), 2018-01-01
Supplement: c7ra12693j1.pdf [file c7ra12693j1.pdf]

## Coherency Image Analysis to Quantify Collagen Architecture: Implications in Scar Assessment

T. D. Clemons,<sup>a</sup> M. Bradshaw,<sup>a</sup> P. Toshniwal,<sup>a</sup> N. Chaudhari,<sup>a</sup> A. Stevenson,<sup>b</sup> J. Lynch,<sup>b,c</sup> M. W. Fear,<sup>b</sup> F. M. Wood<sup>b</sup> and K. S. Iyer<sup>a</sup>

<sup>a</sup> School of Molecular Sciences M313, The University of Western Australia, 35 Stirling Hwy, Crawley, WA, 6009, Australia.

<sup>b</sup> Fiona Wood Foundation and Burn Injury Research Unit, M318, The University of Western Australia, 35 Stirling Hwy, Crawley, WA, 6009, Australia.

<sup>c</sup> Royal College of Surgeons of Ireland, 123 St Stephen's Green, Dublin, Ireland.

### Supporting Information

Table S1 – Current quantitative methods to determine collagen architecture in the skin

| Method                                                             | Reference paper                                                  | Summary of Key Findings                                                                                                                                                                                                                                                                                                                                                                                                                                                                                                                                                                                                                                                                                                                                                     |
|--------------------------------------------------------------------|------------------------------------------------------------------|-----------------------------------------------------------------------------------------------------------------------------------------------------------------------------------------------------------------------------------------------------------------------------------------------------------------------------------------------------------------------------------------------------------------------------------------------------------------------------------------------------------------------------------------------------------------------------------------------------------------------------------------------------------------------------------------------------------------------------------------------------------------------------|
| <b>OrientationJ Analysis (ImageJ)</b>                              |                                                                  | <ul style="list-style-type: none"><li>• Successfully differentiates between normal and scar modelled environments <i>in vitro</i></li><li>• Greater sensitivity when compared to Fourier analysis methods</li><li>• Suitable for analysing coherency differences in the collagen deposited by human keloid scars</li><li>• Quick and easy quantitative analysis method of assessing collagen structure in scarring</li></ul>                                                                                                                                                                                                                                                                                                                                                |
| <b>Fourier Analysis and Collagen Orientation Index (COI)</b>       | Van Zuijlen et al. <sup>1</sup><br>Verhaegen et al. <sup>2</sup> | <ul style="list-style-type: none"><li>• Study compared the accuracy of Fourier analysis of confocal images with individual observers of polarised light and the confocal images of scar tissue and normal skin.<sup>1</sup></li><li>• In follow up work they used the COI to try and differentiate between normal skin, normotrophic, hypertrophic, and keloid scars.<sup>2</sup></li><li>• Fourier analysis was able to achieve a superior measurement of collagen orientation compared with subjective histological evaluation by several experts in the field.<sup>1</sup></li><li>• The COI (based on Fourier analysis) was significantly less for normal skin when compared to scar but was unable to define differences between the scar types.<sup>2</sup></li></ul> |
| <b>Second Harmonic Generation (SHG) imaging</b>                    | Tanaka et al. <sup>3</sup>                                       | <ul style="list-style-type: none"><li>• <i>In vivo</i> SHG imaging of dermal collagen fibres following burns in a rat model.<sup>3</sup></li><li>• Similar to <i>ex vivo</i> analysis of skin sections, SHG imaging is able to discriminate between the effects of thermal denaturation of collagen molecules following a burn injury.<sup>3</sup></li><li>• Expensive specialised equipment required.</li></ul>                                                                                                                                                                                                                                                                                                                                                            |
| <b>Confocal Microscopy</b>                                         | Khorasani et al. <sup>4</sup>                                    | <ul style="list-style-type: none"><li>• Scar collagen morphology comparing differences in full thickness burns and normal tissue using fractal dimension and lacunarity analysis was achieved.<sup>4</sup></li><li>• Confirmed with transmission electron microscopy for comparison.<sup>4</sup></li><li>• More sensitive than Fourier analysis for quantification of scar morphology.</li></ul>                                                                                                                                                                                                                                                                                                                                                                            |
| <b>Histological Staining (e.g. Masson's trichrome or Herovici)</b> | Rawlins et al. <sup>5</sup><br>Sanders et al. <sup>6</sup>       | <ul style="list-style-type: none"><li>• Able to determine the differences in mature burn scars with normal skin.</li><li>• Herovici staining can differentiate type I collagen (red) from type III collagen (blue).<sup>5</sup></li><li>• Masson's suitable for measuring differences' in collagen density in mechanically stressed vs normal skin with computer aided image processing.<sup>6</sup></li><li>• Quantification of collagen possible with post image analysis software of pixel colour thresholding.</li><li>• Unable to be used <i>in vitro</i>.</li></ul>                                                                                                                                                                                                   |



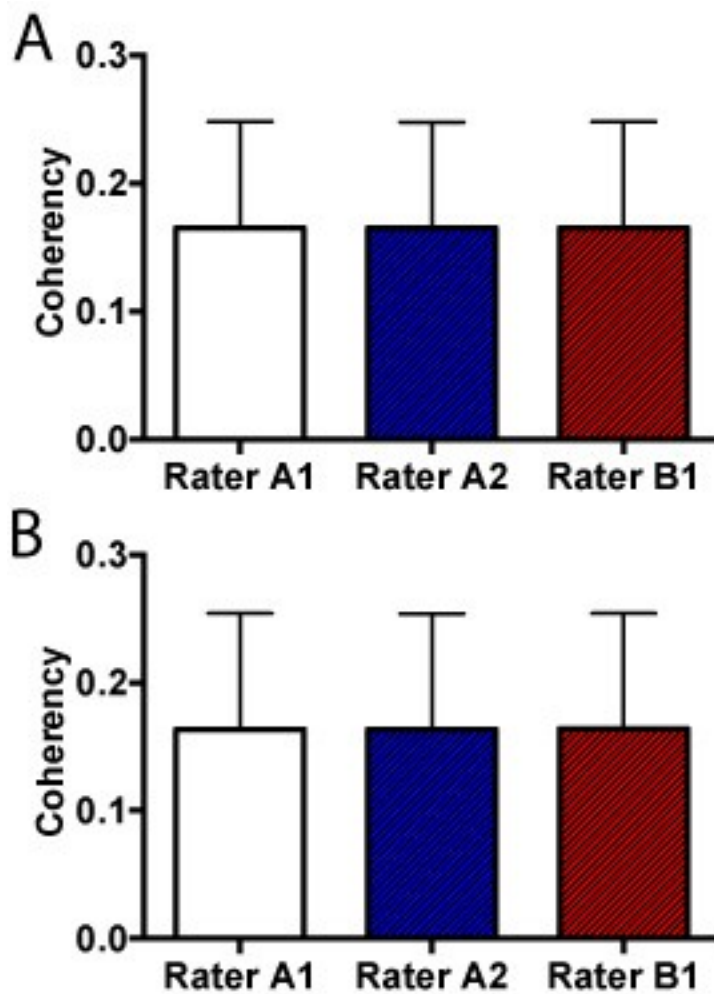

**Figure S1** – Inter and intra-rater reliability of the coherency measurement for *in vitro* collagen deposition in a scar like environment (A) and skin tissue sections (B). No significant difference was observed between rater 1's repeated measures or between rater 1 and rater 2 for the *in vitro* (n=18 images) or the *in vivo* samples (n=50 images). Data displayed as mean  $\pm$  SD and statistically assessed with a one-way ANOVA followed by a Bonferroni comparison test ( $p < 0.05$ ).

#### Supporting Information References

1. van Zuijlen, P. P.; de Vries, H. J.; Lamme, E. N.; Coppens, J. E.; van Marle, J.; Kreis, R. W.; Middelkoop, E., Morphometry of dermal collagen orientation by Fourier analysis is superior to multi-observer assessment. *J Pathol* **2002**, *198* (3), 284-91.
2. Verhaegen, P. D.; Van Zuijlen, P. P.; Pennings, N. M.; Van Marle, J.; Niessen, F. B.; Van Der Horst, C. M.; Middelkoop, E., Differences in collagen architecture between keloid, hypertrophic scar, normotrophic scar, and normal skin: an objective histopathological analysis. *Wound Repair Regen* **2009**, *17* (5), 649-656.
3. Tanaka, R.; Fukushima, S.; Sasaki, K.; Tanaka, Y.; Murota, H.; Matsumoto, T.; Araki, T.; Yasui, T., In vivo visualization of dermal collagen fiber in skin burn by collagen-sensitive second-harmonic-generation microscopy. *J Biomed Opt* **2013**, *18* (6).
4. Khorasani, H.; Zheng, Z.; Nguyen, C.; Zara, J.; Zhang, X. L.; Wang, J. C.; Ting, K.; Soo, C., A Quantitative Approach to Scar Analysis. *Am J Pathol* **2011**, *178* (2), 621-628.
5. Rawlins, J. M.; Lam, W. L.; Karoo, R. O.; Naylor, I. L.; Sharpe, D. T., Quantifying collagen type in mature burn scars: A novel approach using histology and digital image analysis. *J Burn Care Res* **2006**, *27* (1), 60-65.
6. Sanders, J. E.; Goldstein, B. S.; Leotta, D. F.; Richards, K. A., Image processing techniques for quantitative analysis of skin structures. *Comput Meth Prog Bio* **1999**, *59* (3), 167-180.
